# Supplementary material for: Autonomous self-healing polyisoprene elastomers with high modulus and good toughness based on the synergy of dynamic ionic crosslinks and highly disordered crystals
Source: Royal Society of Chemistry journal article supplement (doi:10.1039/d0py01034k), 2020-01-01
Supplement: d0py01034k1.pdf [file d0py01034k1.pdf]

# **Autonomous self-healing polyisoprene elastomer with high modulus and good toughness based on synergy of dynamic ionic crosslinks and highly disordered crystals**

*Yohei Miwa,<sup>1,†,\*</sup> Mayu Yamada,<sup>1</sup> Yu Shinke,<sup>2</sup> and Shoichi Kutsumizu<sup>1</sup>*

<sup>1</sup>Department of Chemistry and Biomolecular Science, Faculty of Engineering, Gifu University, Yanagido, Gifu 501-1193, Japan.

<sup>2</sup>The Yokohama Rubber Co., Ltd., Hiratsuka, 254-8601, Japan.

<sup>†</sup>PRESTO, Japan Science and Technology Agency.

\*Author to whom correspondence should be addressed.

**E-mail: [y\\_miwa@gifu-u.ac.jp](mailto:y_miwa@gifu-u.ac.jp)**

## Table of Contents

### <Supporting Figures>

**Fig. S1.**  $^{13}\text{C}$ -NMR spectrum for *cis*-PI used in this work.

**Fig. S2.** FT-IR spectra for the indicated samples. Bands at  $1708\text{ cm}^{-1}$  and  $1585\text{ cm}^{-1}$  are assigned to  $\nu(\text{C}=\text{O})$  of carboxy and  $\nu(\text{O}-\text{C}-\text{O}^-)$  of sodium carboxylate, respectively.

**Fig. S3.** First heating and first cooling processes of CPI/TPI blend containing 20wt% of TPI.

**Eq. S1.** Calculation of penetration depth of infrared rays in the ATR FT-IR measurement

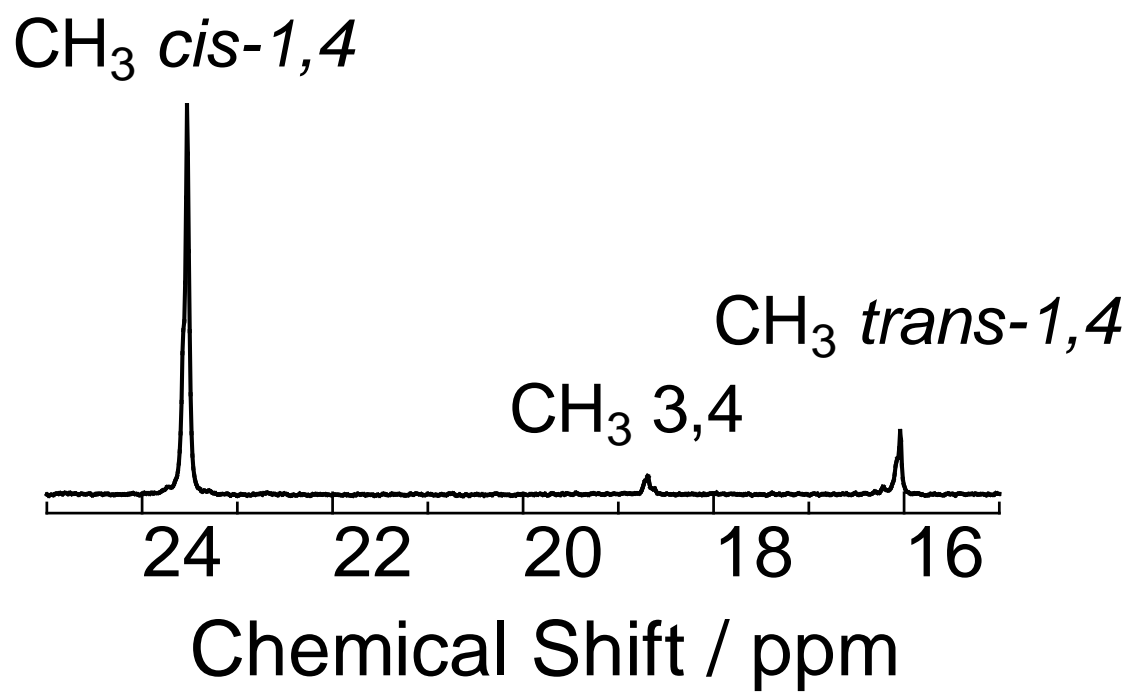

**Fig. S1.**  $^{13}\text{C}$ -NMR spectrum for *cis*-PI used in this work.

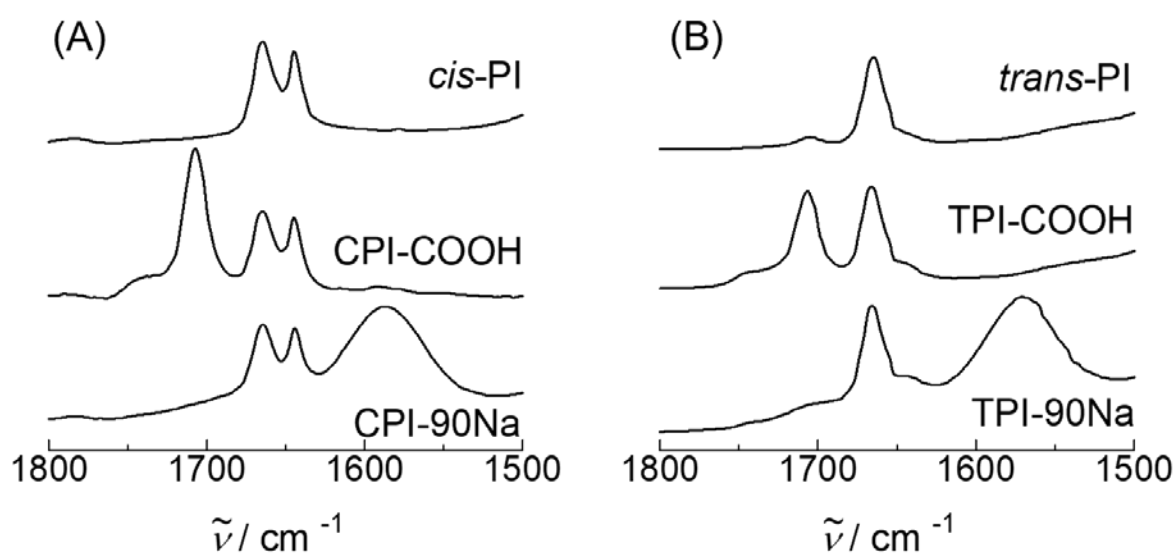

**Fig. S2.** FT-IR spectra for the indicated samples. Bands at 1708  $\text{cm}^{-1}$  and 1585  $\text{cm}^{-1}$  are assigned to  $\nu(\text{C}=\text{O})$  of carboxy and  $\nu(\text{O}-\text{C}-\text{O}^-)$  of sodium

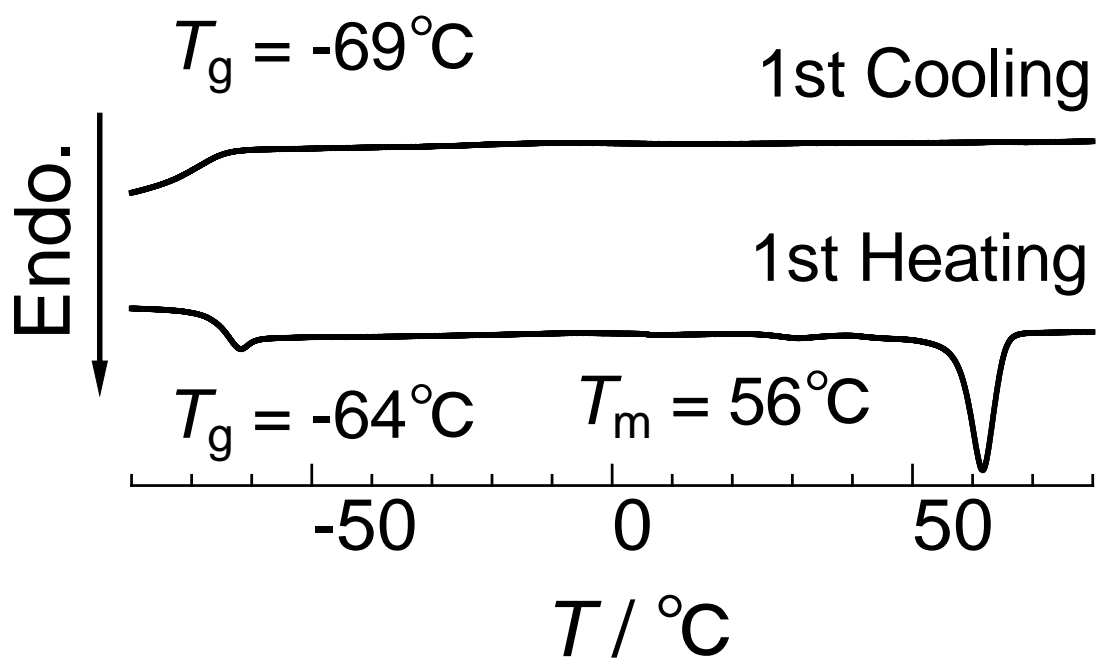

**Fig. S3.** First heating and first cooling processes of CPI/TPI blend containing 20wt% of TPI.

$$d_p = \frac{\lambda}{2\pi\sqrt{n_1^2\sin^2\theta_1 - n_2^2}} \quad (\text{S1})$$

$d_p$ : Penetration Depth

$\lambda$ : Wavelength of Infrared

$\theta_1$ : Incidence Angle (= 45°)

$n_1$ : Refractive Index of Diamond (= 2.42)

$n_2$ : Refractive Index of PI (= 1.51)

**Eq. S1.** Calculation of penetration depth of infrared rays in the ATR FT-IR measurement
